# Supplementary material
Source: Royal Society of Chemistry journal article supplement (doi:10.1039/d6ay00077k)
Supplement: d6ay00077k1.pdf [file d6ay00077k1.pdf]

## Supplementary Information

### **Analytical Characterization of Bulk R-Salt and its Odor Profile to Establish a Framework for Canine Detection**

Janet Crespo-Cajigas<sup>b</sup>, Dawn M. Mills<sup>a\*</sup>, Melissa Clinard<sup>a</sup>, Shawanda Roberts<sup>a</sup>

<sup>a</sup> TEDAC Improvised Explosive Detection and Synthesis Center, FBI Laboratory, Redstone Arsenal, AL, USA

<sup>b</sup> TEDAC Improvised Explosive Detection and Synthesis Center, Visiting Scientist Program, FBI Laboratory, Redstone Arsenal, AL, USA

\*Corresponding author. Email address: [dmills2@fbi.gov](mailto:dmills2@fbi.gov) (D.M. Mills).

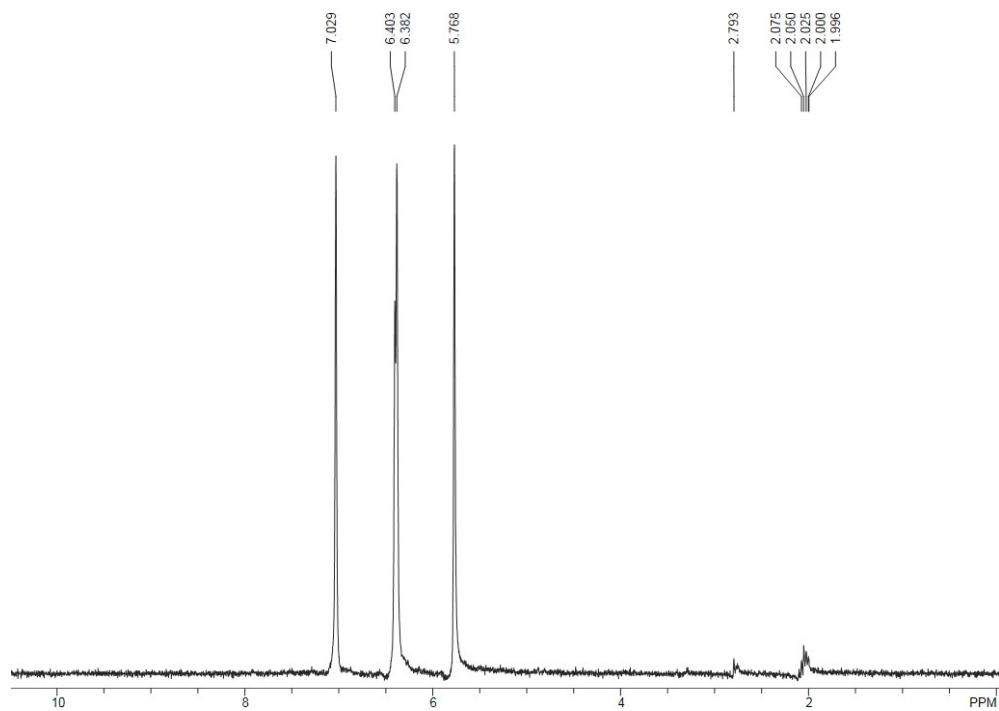

Figure S1. Proton ( $^1\text{H}$ ) nuclear magnetic resonance (NMR) for R-Salt-R

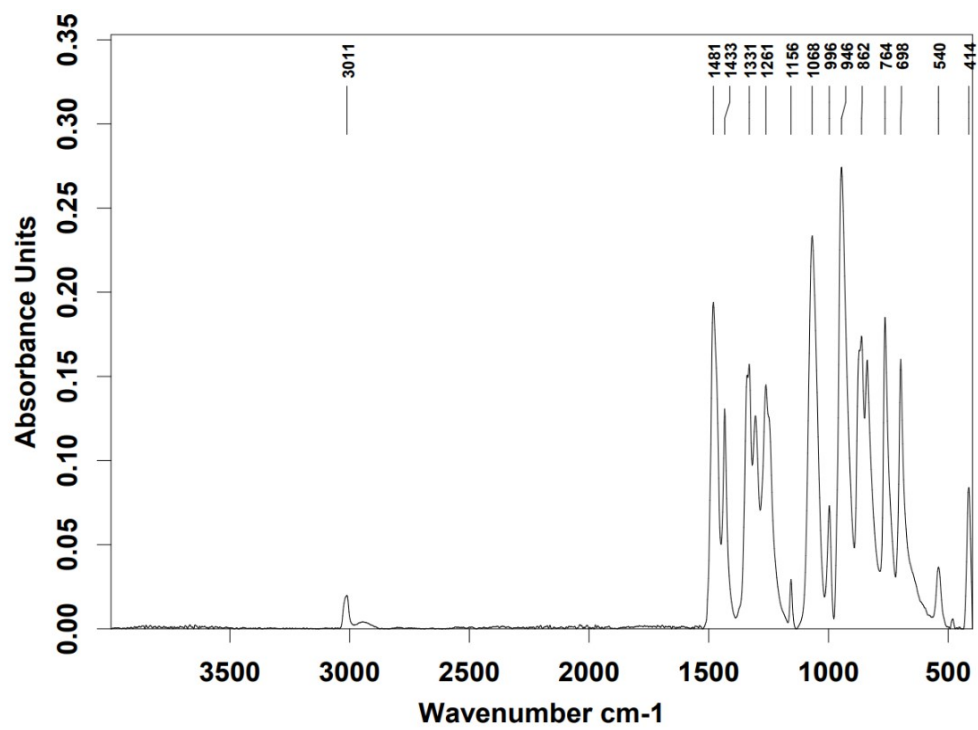

Figure S2. Fourier transform infrared spectroscopy (FT-IR) spectrum for R-Salt-R

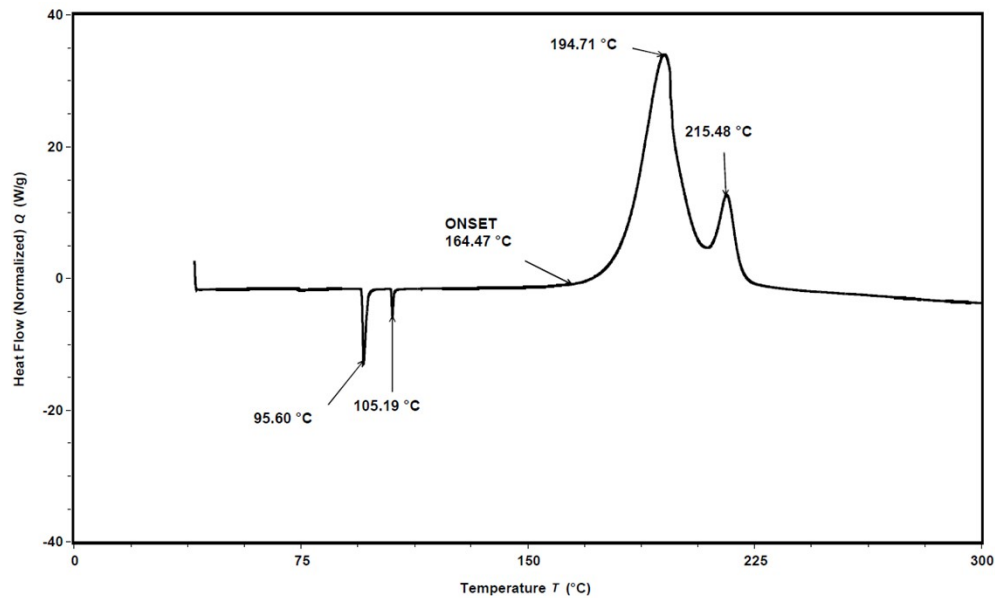

Figure S3. Differential scanning calorimetry (DSC) for R-Salt-R

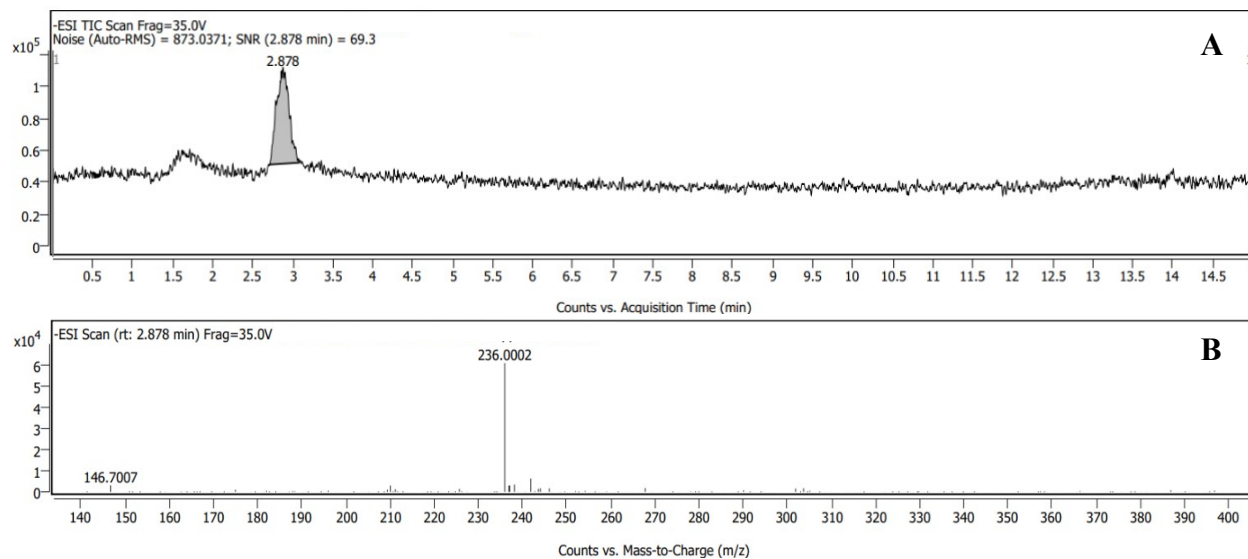

Figure S4. Liquid chromatography-electrospray ionization-mass spectrometry (LC-ESI-MS) chromatogram and spectrum for R-Salt-R
